# Supplementary material for: Preparation of water-dispersed monolayer LDH nanosheets by SMA intercalation to hinder the restacking upon redispersion in water
Source: Royal Society of Chemistry journal article supplement (doi:10.1039/d3na00087g), 2023-01-01
Supplement: d3na00087g1.pdf [file d3na00087g1.pdf]

## Supporting Information

### **Preparation of water-dispersed monolayer LDH nanosheets by SMA intercalation to hinder the restacking upon redispersion in water**

Qingqing Qin<sup>a,b</sup>, Yingmo Hu<sup>a\*</sup>, Junya Wang<sup>c</sup>, Yuanyuan Yang<sup>b</sup>, Ting Lei<sup>b</sup>, Zhenyu Cui<sup>d</sup>, Sufang Guo<sup>a</sup>, Shuhao Qin<sup>b\*\*</sup>

<sup>a</sup>Engineering Research Center of Ministry of Education for Geological Carbon Storage and Low Carbon Utilization of Resources, Beijing Key Laboratory of Materials Utilization of Nonmetallic Minerals and Solid Wastes, National Laboratory of Mineral Materials, School of Material Sciences and Technology, China University of Geosciences, Beijing 100083, China

<sup>b</sup>Guizhou Material Industry Technology Research Institute, Guiyang, 550025, China

<sup>c</sup>Faculty of Environmental Science and Engineering, Kunming University of Science and Technology, Kunming, 650500, China

<sup>d</sup>School of Materials Science and Engineering, Tiangong University, Tianjin, 300387, PR China

## **1. Experimental section**

### **1.1 Materials.**

Styrene-maleic anhydride copolymer (SMA, Mw=5500) was obtained from Jiaxing Huawen Chemical Co., Ltd. (Jiaxing, China). Mg(NO<sub>3</sub>)<sub>2</sub>·6H<sub>2</sub>O (purity > 98 %), Al(NO<sub>3</sub>)<sub>3</sub>·9H<sub>2</sub>O (purity > 98 %), Zn(NO<sub>3</sub>)<sub>2</sub>·6H<sub>2</sub>O (purity > 98 %), Fe(NO<sub>3</sub>)<sub>3</sub>·9H<sub>2</sub>O (purity > 98 %) and NaOH (purity > 98 %), were purchased from Aladdin Chemical Co., Ltd. (Shanghai, China). These chemicals were all used as received without further purification.

## **1.2 Synthesis of m-LDH nanosheets and SMA-LDH powder**

$1.1 \times 10^{-3}$  mol SMA were dispersed in a solution containing 50 ml NaOH (4 M) and 50 ml DI water, and stirred at room temperature for 2 h. After that, A salt solution (100 mL) containing a mixture of 0.075 mol  $\text{Mg}(\text{NO}_3)_2 \cdot 6\text{H}_2\text{O}$  and 0.025 mol  $\text{Al}(\text{NO}_3)_3 \cdot 9\text{H}_2\text{O}$  was added dropwise. The pH was adjusted to 10 by dropwise addition of NaOH (4 M). The resulting reaction mixture was aged at room temperature for 12 h with stirring at 700 rpm. After ageing, the colloidal solutions of monolayer LDH nanosheets (m-LDH) were obtained, and the m-LDH gel was collected by centrifuged and washed thoroughly with deionized water until it had a pH close to 7, the SMA-LDH was obtained by the m-LDH gel dried at 60 °C overnight in an oven.

Similarly, SMA-ZnFe-LDH was also prepared [using  $\text{Zn}(\text{NO}_3)_2$  to replace  $\text{Mg}(\text{NO}_3)_2$ ,  $\text{Fe}(\text{NO}_3)_3$  to replace  $\text{Al}(\text{NO}_3)_3$ ] following the same method. After ageing, the m-ZnFe LDH gel was collected by centrifuged and washed thoroughly with deionized water until it had a pH close to 7, the SMA-ZnFe-LDH was obtained by the m-LDH gel dried at 60 °C overnight in an oven.

## **1.3 Synthesis of r-m-LDH**

The above obtained 1 g SMA-LDH powder was dispersed in 100 ml deionized water, stirring and ultrasonic treatment for 30 min.

Likewise, the r-m-ZnFe LDH was obtained by dispersing 1 g of SMA-ZnFe-LDH powder in 100 ml of deionized water, followed by stirring and ultrasonic treatment for 30 min.

## **1.4 Characterization of samples**

The phase compositions and crystallographic structures of as-synthesized samples were determined by powder X-ray diffraction (XRD) measurements performed on a ARL EQUINOX 3000 instrument in reflection mode with Cu K radiation, Scanning 15 min. The functional groups of the LDH were identified by Attenuated total reflectance Fourier transform infrared spectra (ATR-FTIR, NEXUS570, Nicolet, America). The morphologies of the samples were characterized by field-emission scanning electron microscopy (SEM, Quanta 250 FEG, FEI, America). Before observation, the dried samples were sputtered and coated with gold, for ~30 s under an argon atmosphere. High resolution transmission electron microscopy (HR-TEM) images were obtained on a FEI Tecnai G2 F20, operating at 200 kV. A Bruker Dimension Icon atomic force microscopy (AFM) system was used to examine the thickness of nanosheets deposited onto Si wafers.

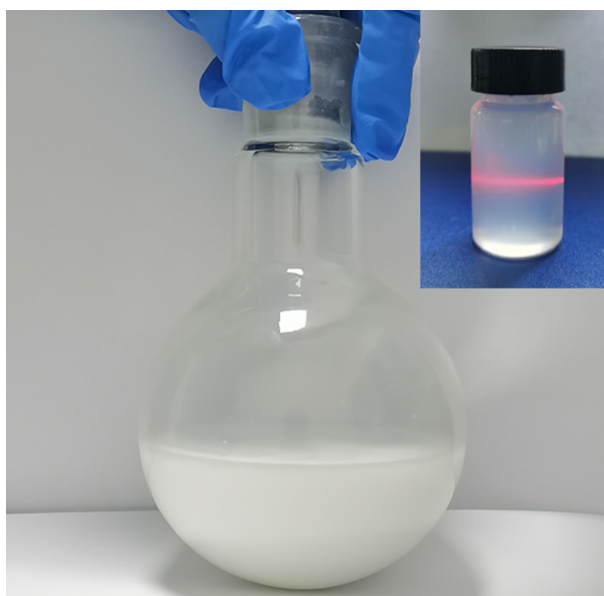

Figure S1 Product of m-LDH prepared by our new method. Inset: Highly dispersed m-LDH with a clear Tyndall effect.

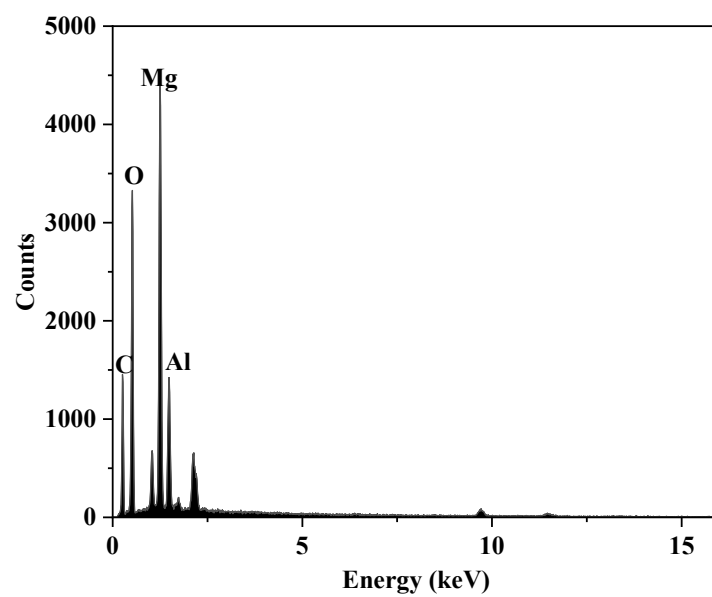

Figure S2 EDS spectrum of SMA-LDH.

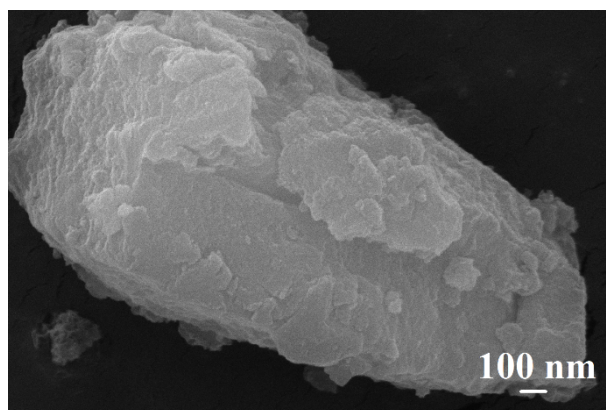

Figure S3 SEM image of SMA-LDH.

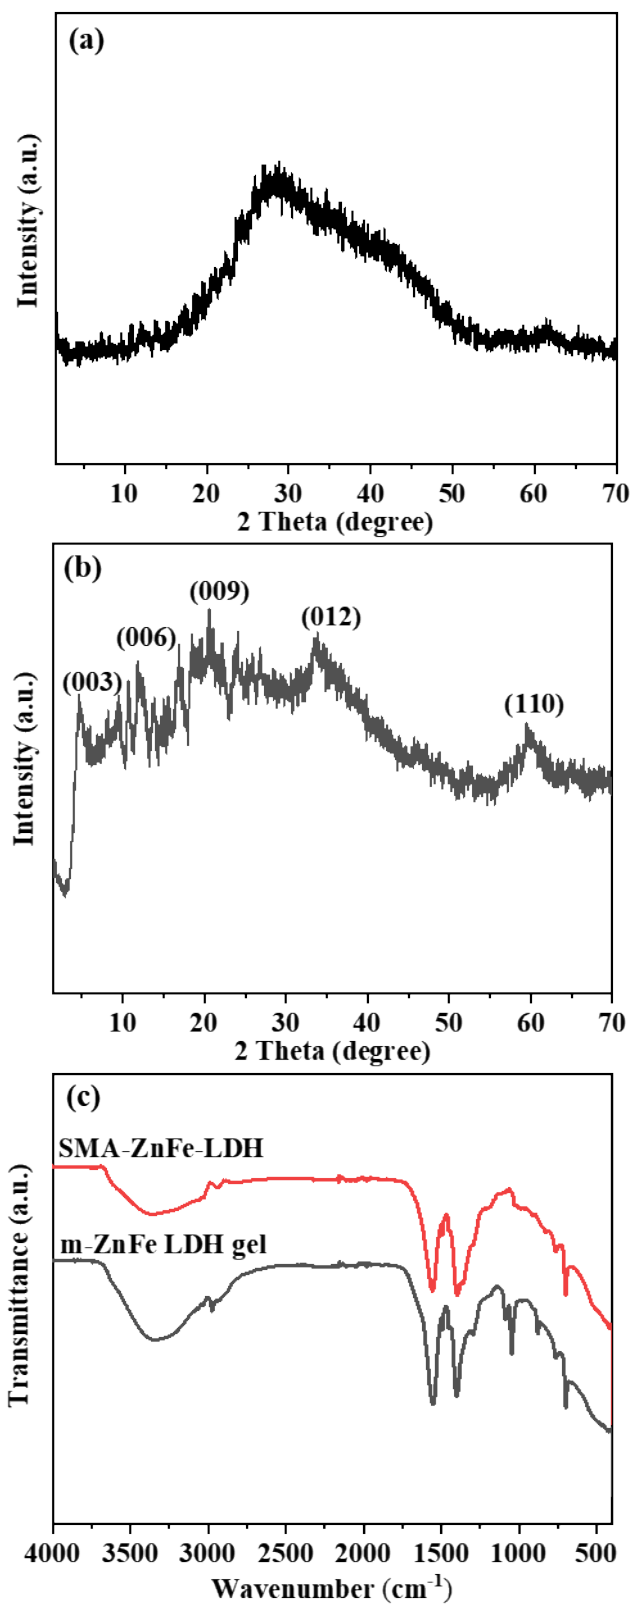

Figure S4 (a) XRD pattern of m-ZnFe LDH, (b) XRD pattern of SMA-ZnFe-LDH, and (c) ATR-FTIR spectra of m-ZnFe LDH, and SMA-ZnFe-LDH.

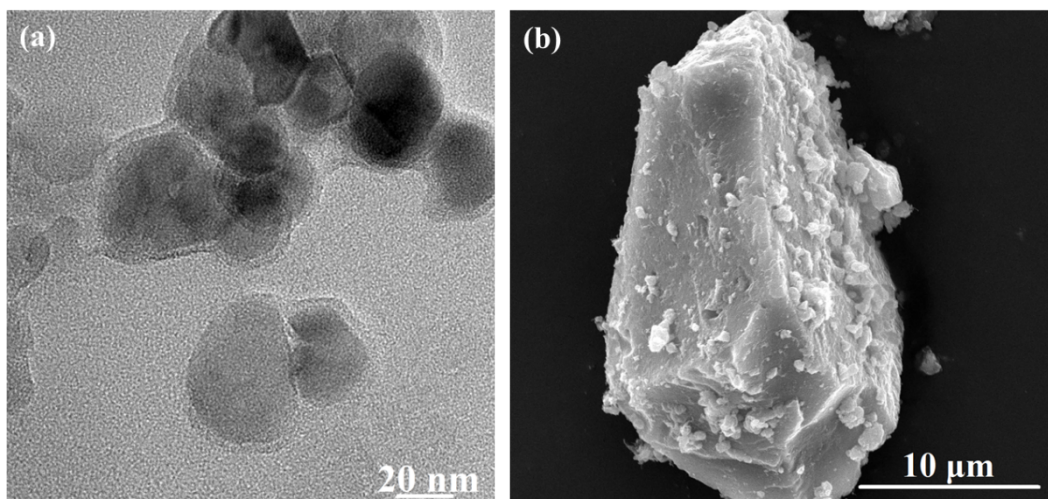

Figure S5 (a) TEM image of m-ZnFe LDH, (b) SEM image of SMA-ZnFe-LDH.

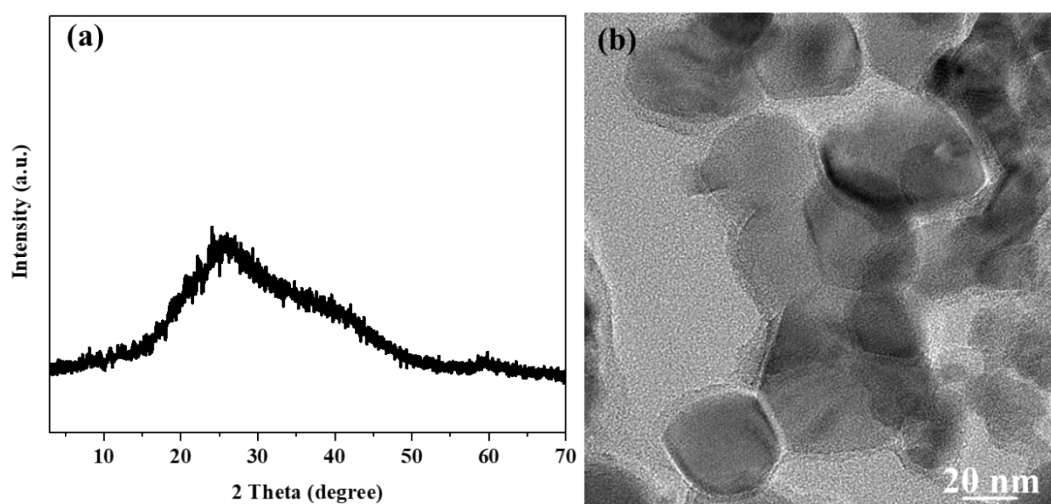

Figure S6 (a) XRD pattern of r-m-ZnFe LDH, Inset: Highly dispersed r-m-ZnFe LDH with a clear Tyndall effect, (b) TEM image of r-m-ZnFe LDH.

## References

1. Q. Wang and D. O'Hare, *Chem. Commun. (Camb)*, 2013, **49**, 6301-6303.
2. J. Yu, B. R. Martin, A. Clearfield, Z. Luo and L. Sun, *Nanoscale*, 2015, **7**, 9448-9451.
3. H. Chi, J. Dong, T. Li, S. Bai, L. Tan, J. Wang, T. Shen, G. Liu, L. Liu, L. Sun, Y. Zhao and Y.-F. Song, *Green Energy Environ.*, 2022, **7**, 975-982.
